# Supplementary material
Source: PubMed Central journal article supplement (PMC5656005)
Supplement: NIHMS913563-supplement-Supplemental_Information.pdf [file NIHMS913563-supplement-Supplemental_Information.pdf]

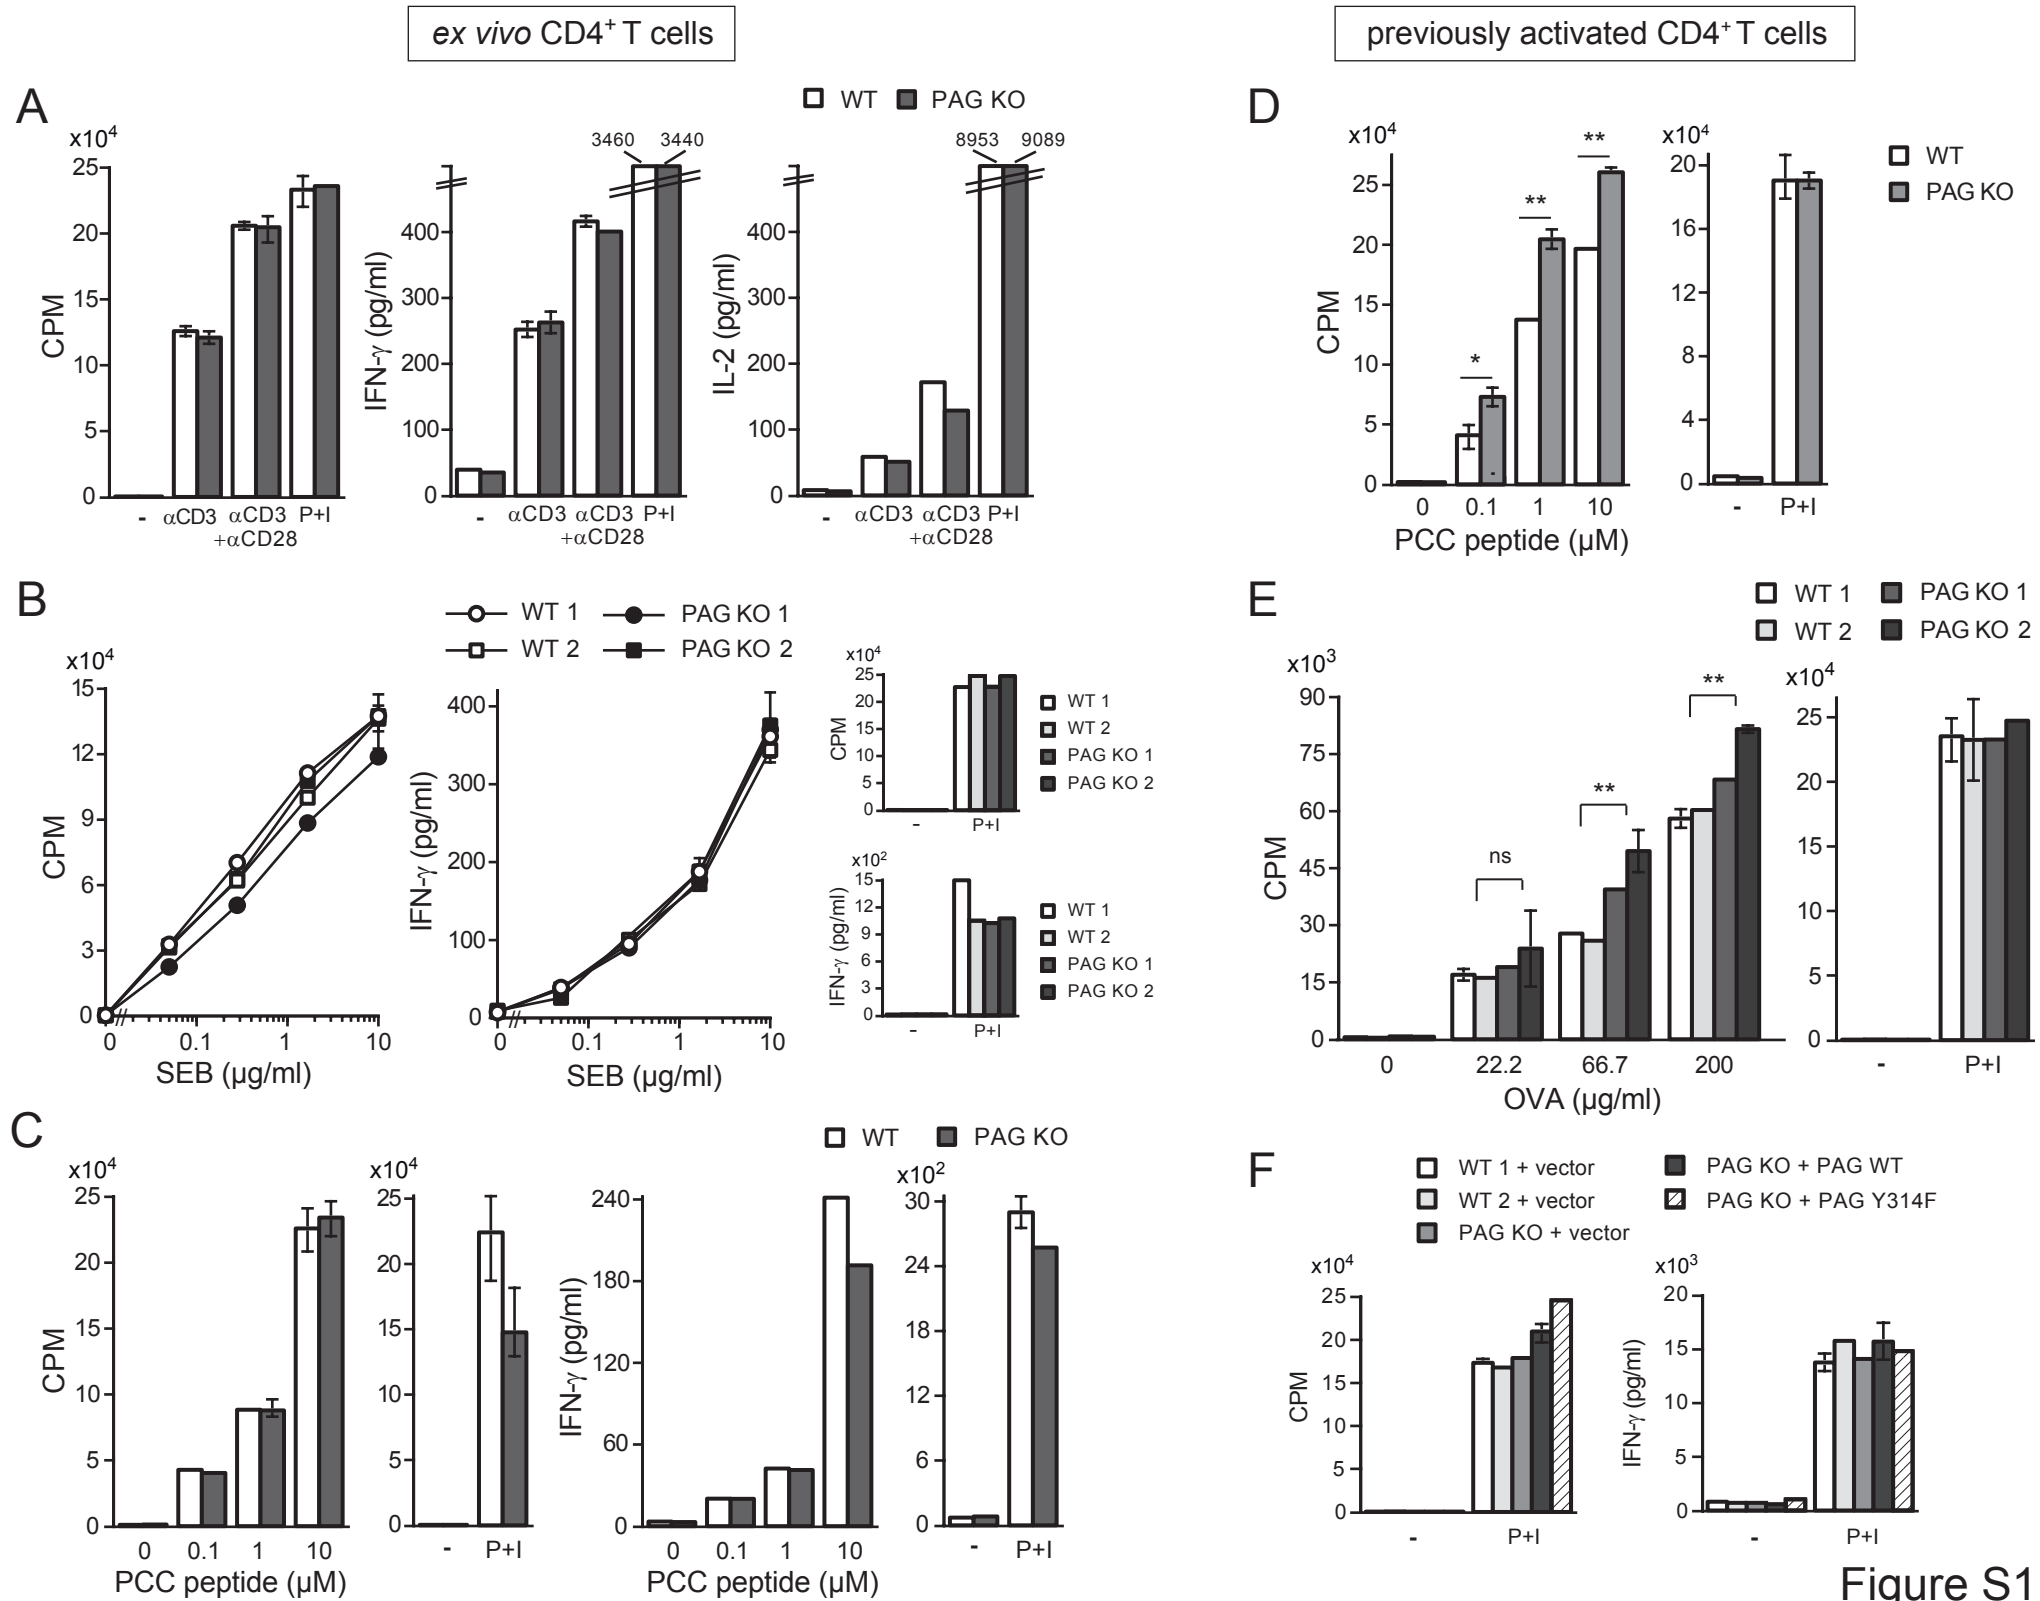

Figure S1

**Supplemental Figure 1. Related to Figure 1. Impact of PAG deficiency in T cells.**

(A,B). Freshly isolated (“*ex vivo*”) CD4<sup>+</sup> T cells from WT or PAG KO mice were stimulated with anti-CD3 (3 μg/ml), anti-CD3 (3 μg/ml) plus anti-CD28 (1 μg/ml) or with P+I (A). Alternatively, they were stimulated with the indicated concentrations of SEB plus WT splenocytes, or P+I (B). Thymidine incorporation and release of IFN-γ and IL-2 were assessed, as detailed for Figure 1B. (C). Purified CD4<sup>+</sup> T cells from TCR AND transgenic mice were activated with the indicated concentrations of PCC peptide and WT splenocytes, or with P+I. Proliferation and production of IFN-γ were monitored. (D). As in Figure 1D, except that thymidine incorporation was monitored. (E). As in Figure 1E, except that thymidine incorporation was monitored. (F). Same as Figure 1G, except that cells were simulated with P+I. \**p*<0.05; \*\**p*<0.01; ns: not significant. Representative of n = 6 (A), n = 4 (B), n = 4 (C), n = 4 (D), n = 3 (E) and n = 2 (F).

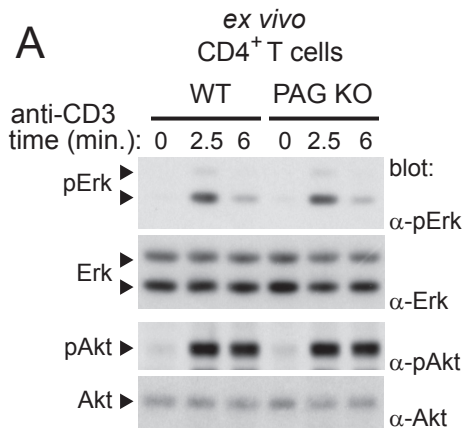

**B** *ex vivo* CD4<sup>+</sup> T cells

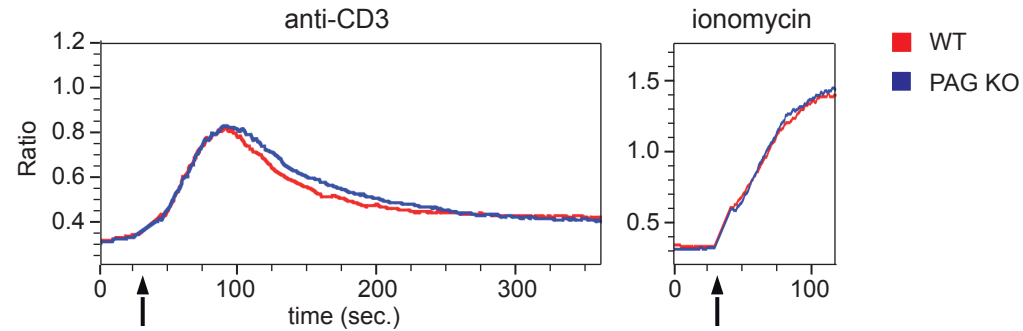

**C**

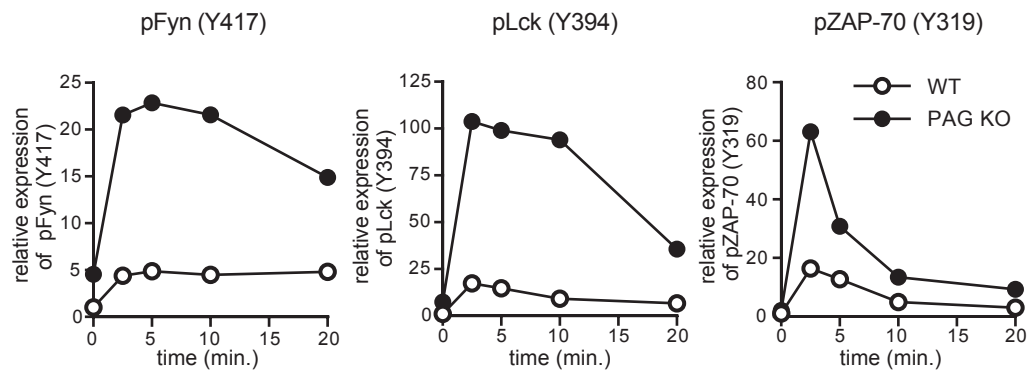

**D**

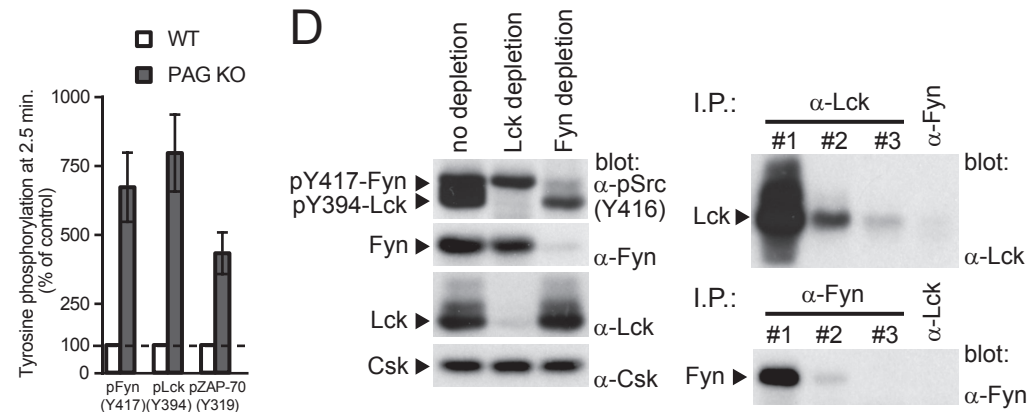

**E**

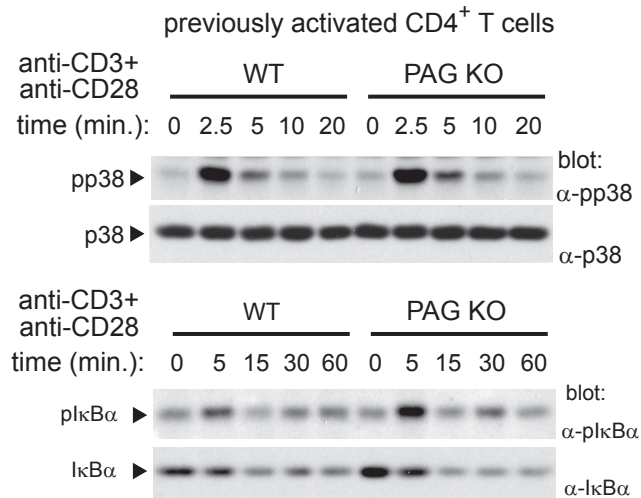

**F**

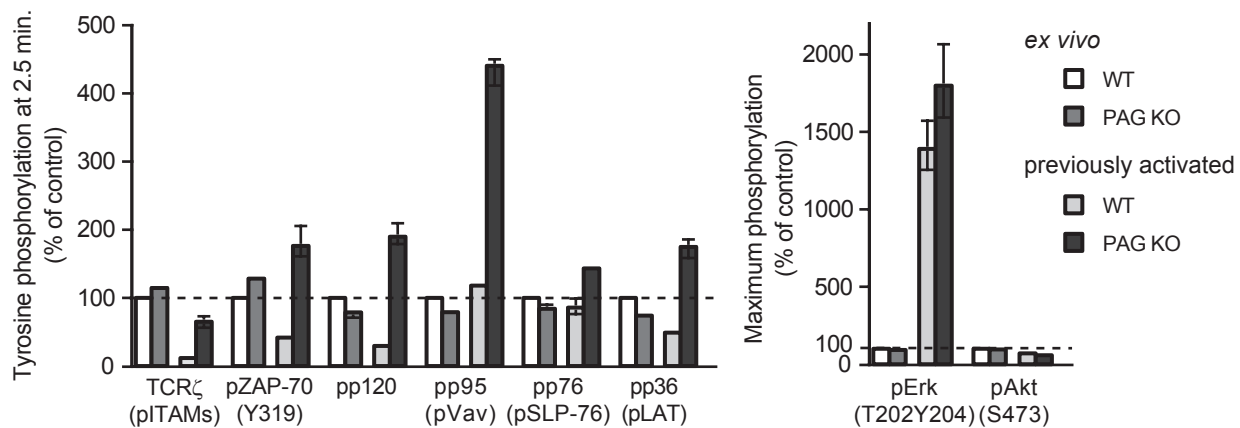

Figure S2

**Supplemental Figure 2. Related to Figure 2. Influence of PAG deficiency on TCR signaling.** (A,B). As in Figure 2D,C, respectively, except that *ex vivo* CD4<sup>+</sup> T cells were used. (C). Quantification of data from Figure 2B. Levels of phosphorylation of the indicated proteins in unstimulated previously activated WT T cells were considered as 1.0 (left). Cumulative measurements are shown on the right; extent of phosphorylation 2.5 minutes after stimulation of previously activated WT T cells was taken as 100%. Mean values with SD are shown. (D). To demonstrate that the 59 kDa- and 56 kDa- tyrosine phosphorylated proteins recognized by the anti-pSrc (pY416) antibodies were Fyn and Lck, respectively, PAG KO T cells were stimulated with anti-CD3. After lysis, either Fyn or Lck was depleted from cell lysates by three rounds of sequential immunoprecipitation. Lysates, immunodepleted or not, were then probed by immunoblotting with anti-pSrc (pY416) antibodies (left). The amounts of Fyn and Lck recovered in the sequential immunoprecipitations are shown on the right. (E). Same as Figure 2D, except that cell lysates were probed by immunoblotting with antibodies recognizing phospho-p38 or phospho-I $\kappa$ B $\alpha$ . (F) Quantification of data depicted in Figure 2A,B,D. Extent of phosphorylation 2.5 minutes after stimulation (for protein tyrosine phosphorylation) or at the time of maximal phosphorylation (for pErk and pAkt) of *ex vivo* T cells from WT mice was considered as 100%. Mean values with SD are shown. Representative of n = 3 (A), n = 3 (B), n = 1 (D) and n = 2 (E).

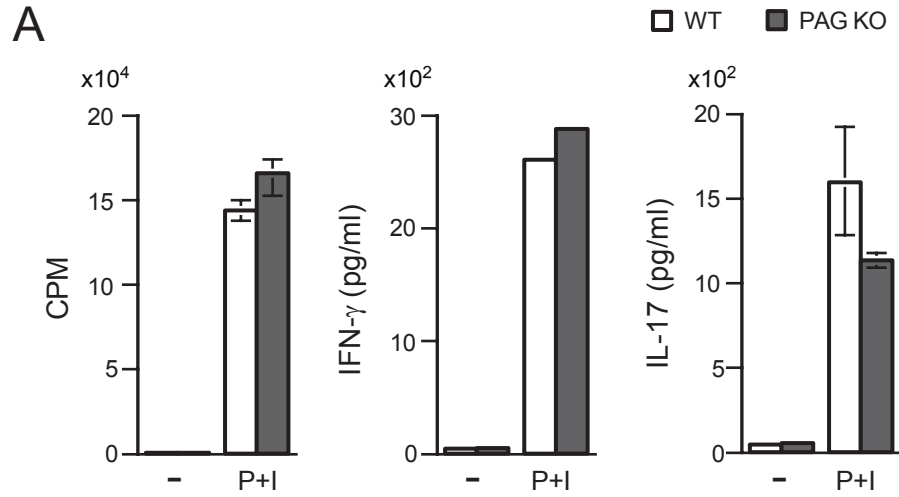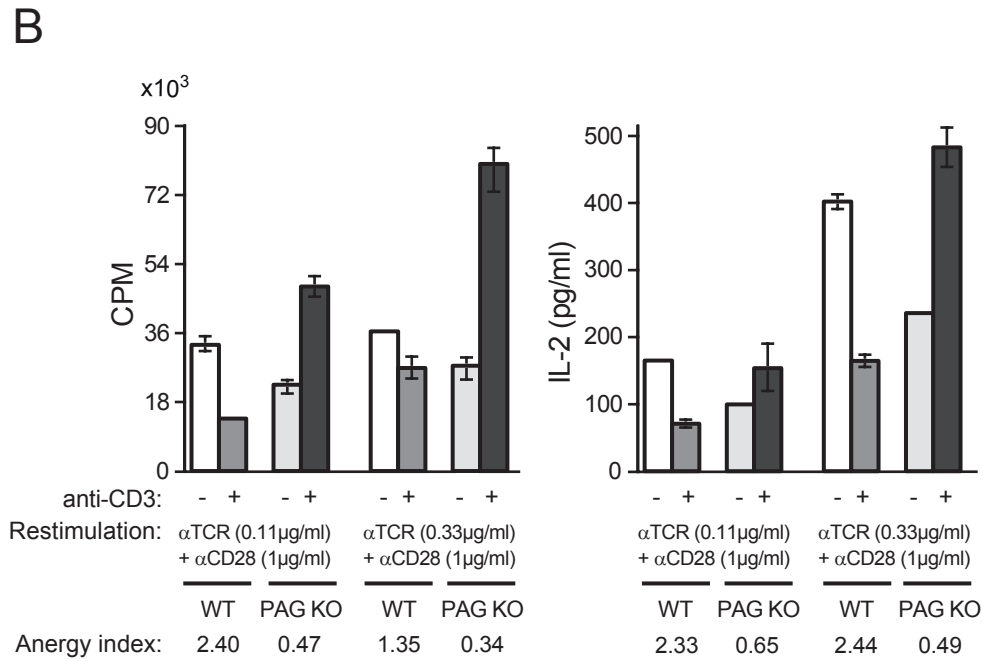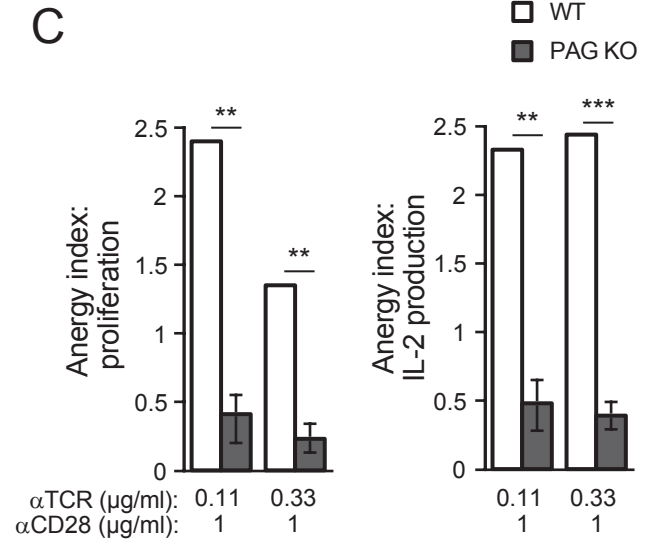

Figure S3

**Supplemental Figure 3. Related to Figure 3. Impact of PAG deficiency on EAE and anergy.** (A). Same as in Figure 3B, except that cells were re-stimulated with P+I. (B,C). CD4<sup>+</sup> T cells were activated with anti-CD3 plus anti-CD28, and subsequently expanded in medium containing IL-2. They were then treated or not with anti-CD3 (1 µg/ml) to trigger anergy, and re-stimulated with anti-TCR and anti-CD28. Thymidine incorporation and IL-2 secretion were assessed. The anergy index is the ratio of thymidine incorporation or IL-2 secretion between untreated and anti-CD3-treated cells. Means with SD of triplicates are shown (B). Anergy indices are represented graphically (C). Representative of n = 2 (A), n = 4 (B,C).

ex vivo CD4<sup>+</sup> T cells

A

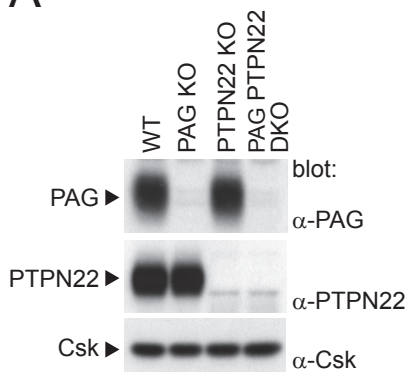

B

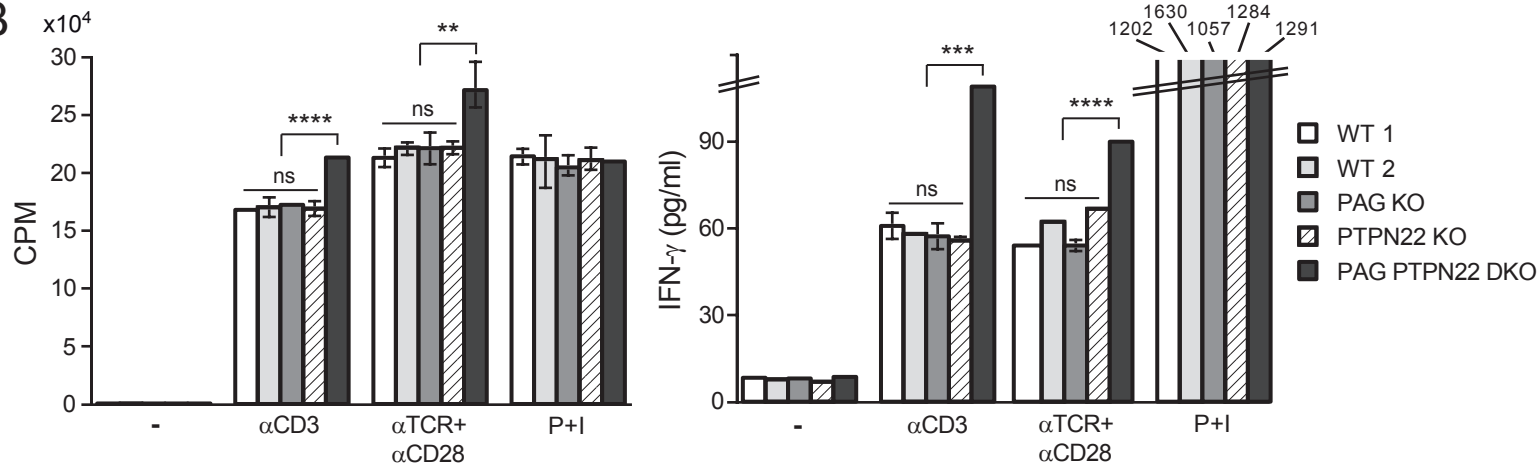

C

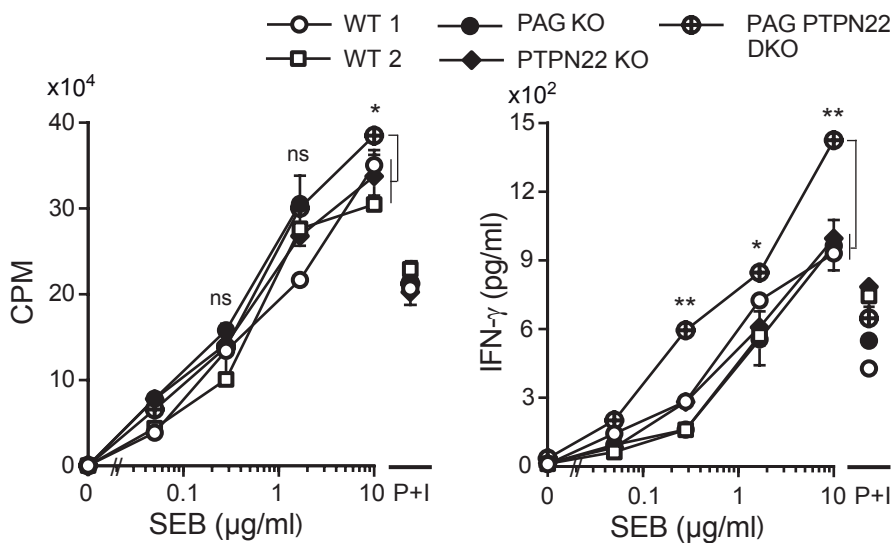

D

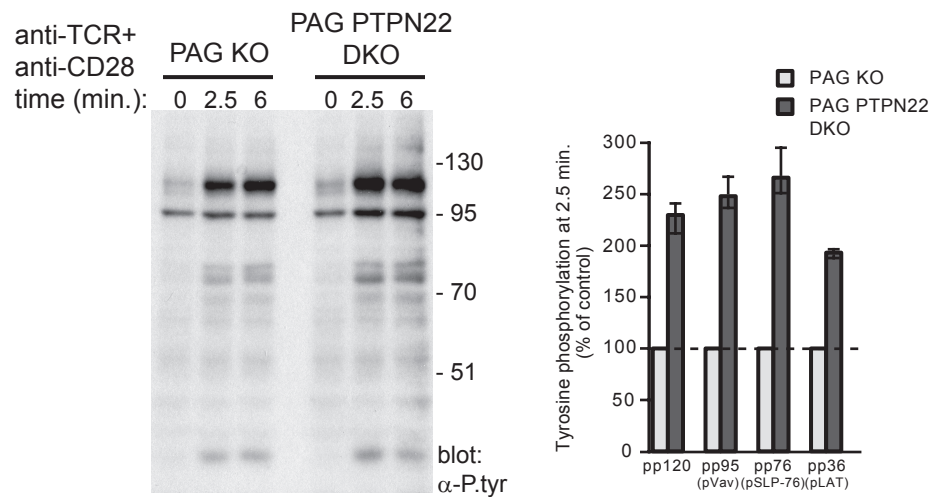

previously activated CD4<sup>+</sup> T cells

E

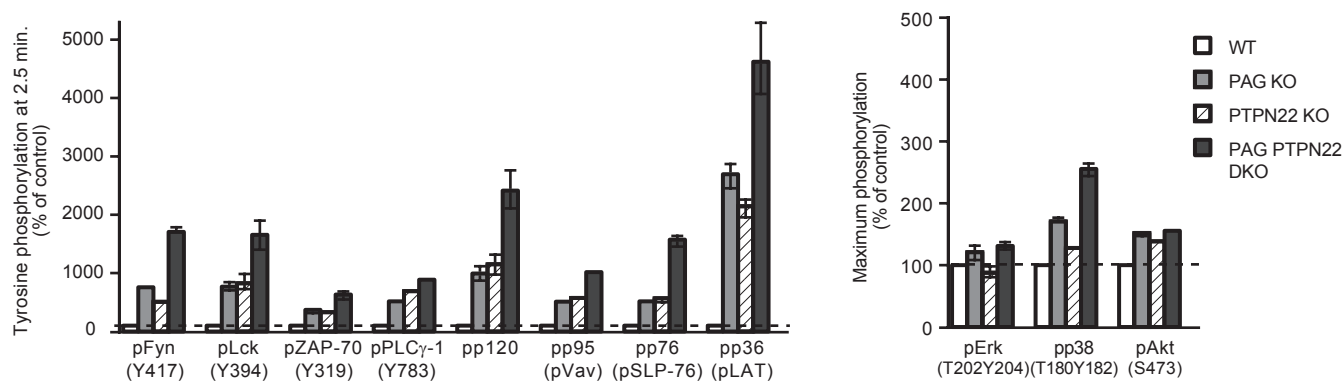

Figure S4

**Supplemental Figure 4. Related to Figure 5. Impact of PAG and PTPN22 on T cell responses.** (A). Expression of PTPN22 and PAG in purified CD4<sup>+</sup> T cells from WT, PAG KO, PTPN22 KO or PAG PTPN22 DKO mice was probed by immunoblotting of total cell lysates. (B-D). Same as Figure 5A-C, respectively, except that purified *ex vivo* CD4<sup>+</sup> T cells were used for stimulation either with anti-CD3 (3 µg/ml), anti-TCR (3 µg/ml) plus anti-CD28 (1 µg/ml) (B) or with SEB (C). Quantification of the data depicted in panel D (left) is shown on the right. Extent of phosphorylation 2.5 minutes after stimulation of *ex vivo* PAG KO T cells was considered as 100%. Mean values with SD are shown (D). (E). Quantification of the data depicted in Figure 5C,E. Extent of phosphorylation 2.5 minutes after stimulation (for protein tyrosine phosphorylation) or at the time of maximal phosphorylation (for pErk, pp38 and pAkt) in previously activated T cells from WT mice was considered as 100%. Mean values with SD are shown. \* $p < 0.05$ ; \*\* $p < 0.01$ ; \*\*\* $p < 0.001$ ; \*\*\*\* $p < 0.0001$ ; ns: not significant. Representative of  $n > 4$  (A),  $n = 3$  (B),  $n = 2$  (C) and  $n = 2$  (D).



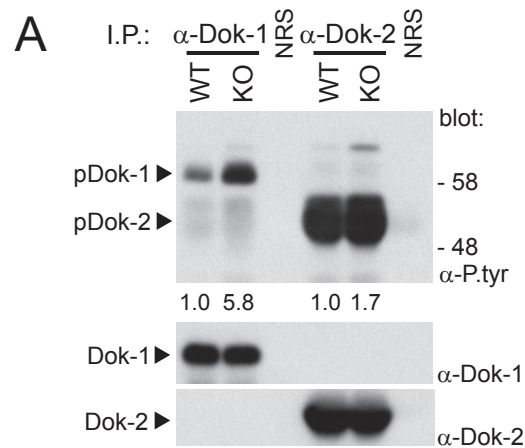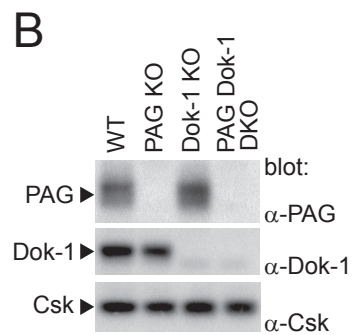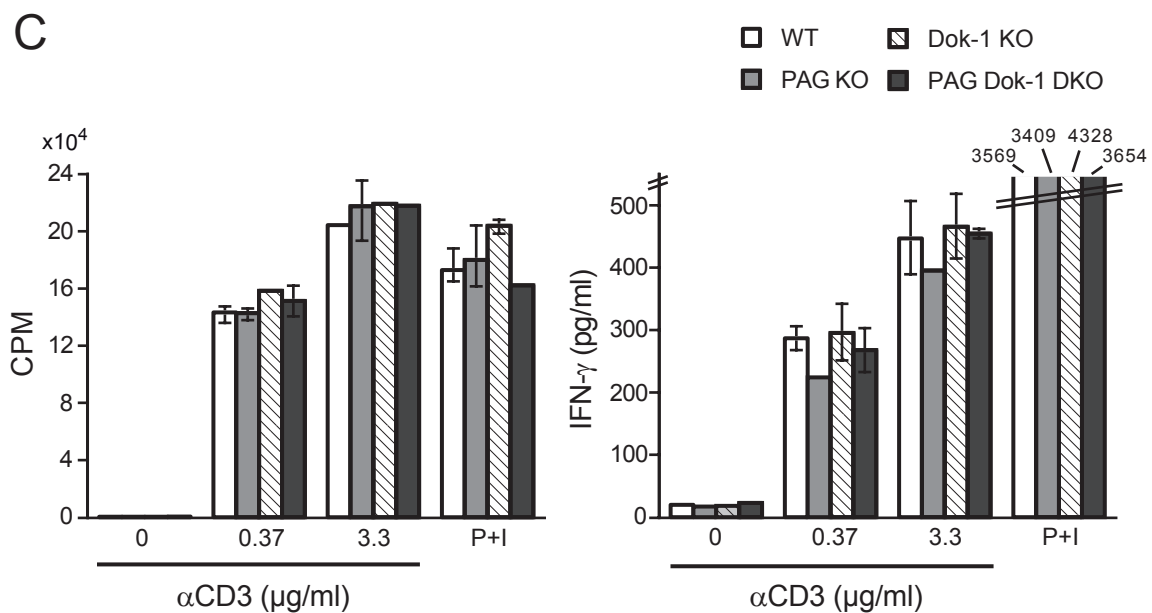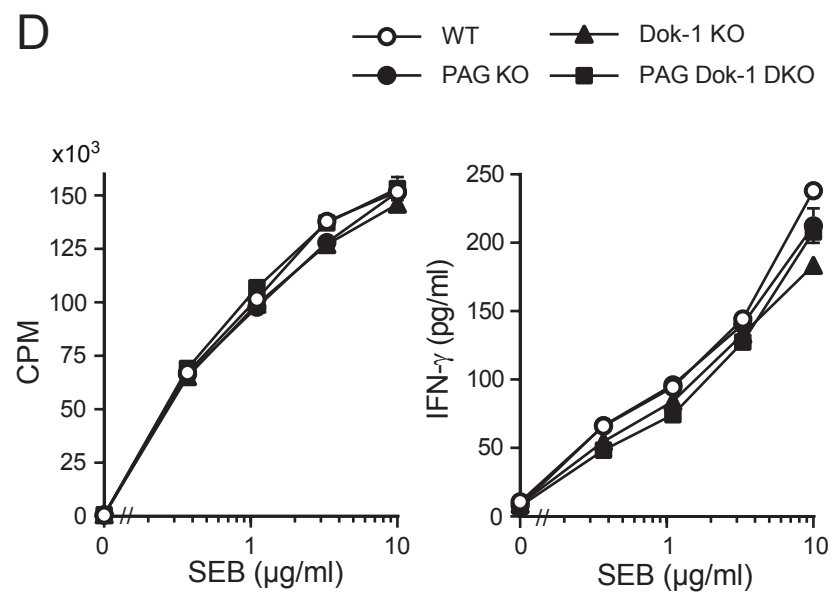

Figure S5

**Supplemental Figure 5. Related to Figure 6. Effect of combined loss of Dok-1 and PAG.** (A). Same as Figure 6B, except that immunoprecipitates were probed by anti-P.tyr immunoblotting. Quantification of extent of phosphorylation of Dok-1 and Dok-2 is shown below the top panel. (B). Same as Figure 6D, except that expression of PAG and Dok-1 was analyzed by immunoblotting of total cell lysates. (C,D). Same as Figure 6D, except that freshly isolated T cells were used. Cells were activated with anti-CD3 or P+I (C), or SEB (D). Representative of n = 4 (A), n = 4 (B), n = 4 (C) and n = 2 (D).

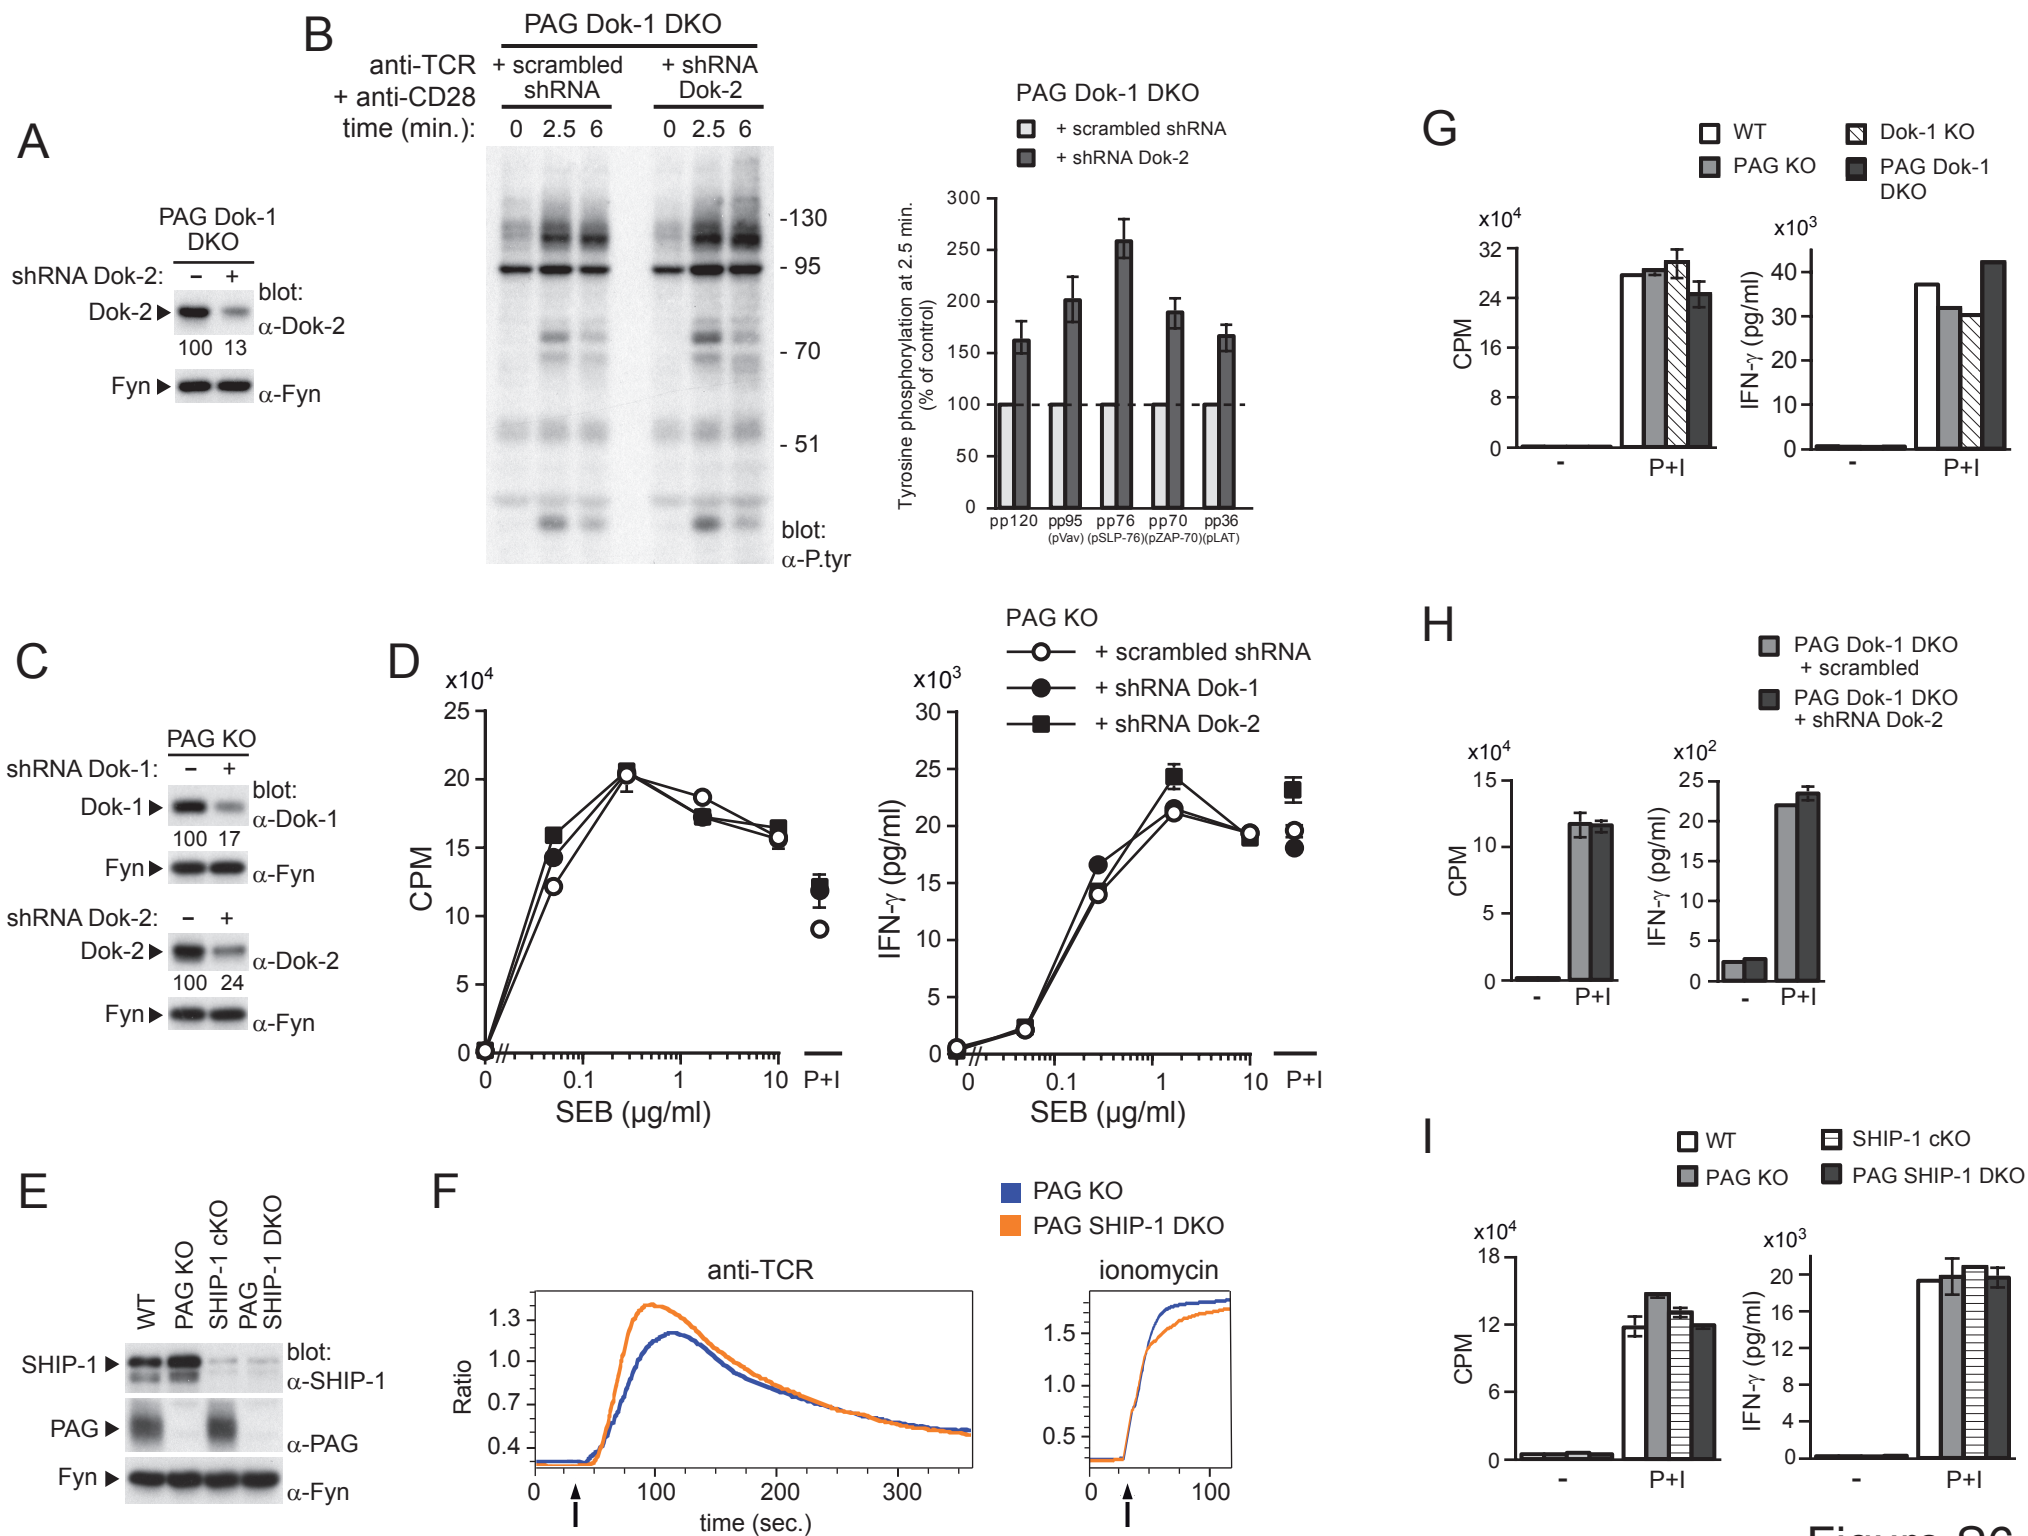

Figure S6

**Supplemental Figure 6. Related to Figure 6. Impact of combined loss of Dok adaptors and PAG, or SHIP-1 and PAG.** (A). Expression of Dok-2 in PAG Dok-1 DKO T cells transduced with scrambled (-) or Dok-2-specific (+) shRNAs was analyzed by immunoblotting. Quantification of protein expression is shown below the panel. (B). Same as (A), except that cells were stimulated with anti-TCR plus anti-CD28, and protein tyrosine phosphorylation was analyzed (left). Quantification of the data depicted is shown on the right. Extent of phosphorylation 2.5 minutes after stimulation of previously activated PAG Dok-1 DKO T cells transduced with scrambled shRNAs was considered as 100%. Mean values with SD are shown. (C,D). PAG KO T cells were transduced with scrambled (-), Dok-1- or Dok-2-specific (+) shRNAs. Expression of Dok adaptors was analyzed by immunoblotting. Quantification of protein expression is shown below each panel (C). Cells were also stimulated with SEB and irradiated splenocytes, or P+I, and thymidine incorporation and IFN- $\gamma$  secretion were analyzed, as detailed for Figure 6D (D). (E). Same as Figure 6F, except that expression of PAG and SHIP-1 was analyzed by immunoblotting of total cell lysates. Since the SHIP-1 KO is the result of breeding of a floxed SHIP-1 allele with *Cd4-Cre*, a small amount of residual SHIP-1 is present, due to incomplete deletion of the allele. (F). Same as Figure 6F, except that cells were stimulated with anti-TCR or ionomycin, and calcium fluxes were analyzed, as detailed for Figure 2C. (G-I). Same as Figure 6D-F, except that cells were stimulated with P+I. Representative of n = 3 (A), n = 2 (B), n = 4 (C), n = 4 (D), n = 2 (E), n = 2 (F) and n = 2-3 (G-I).

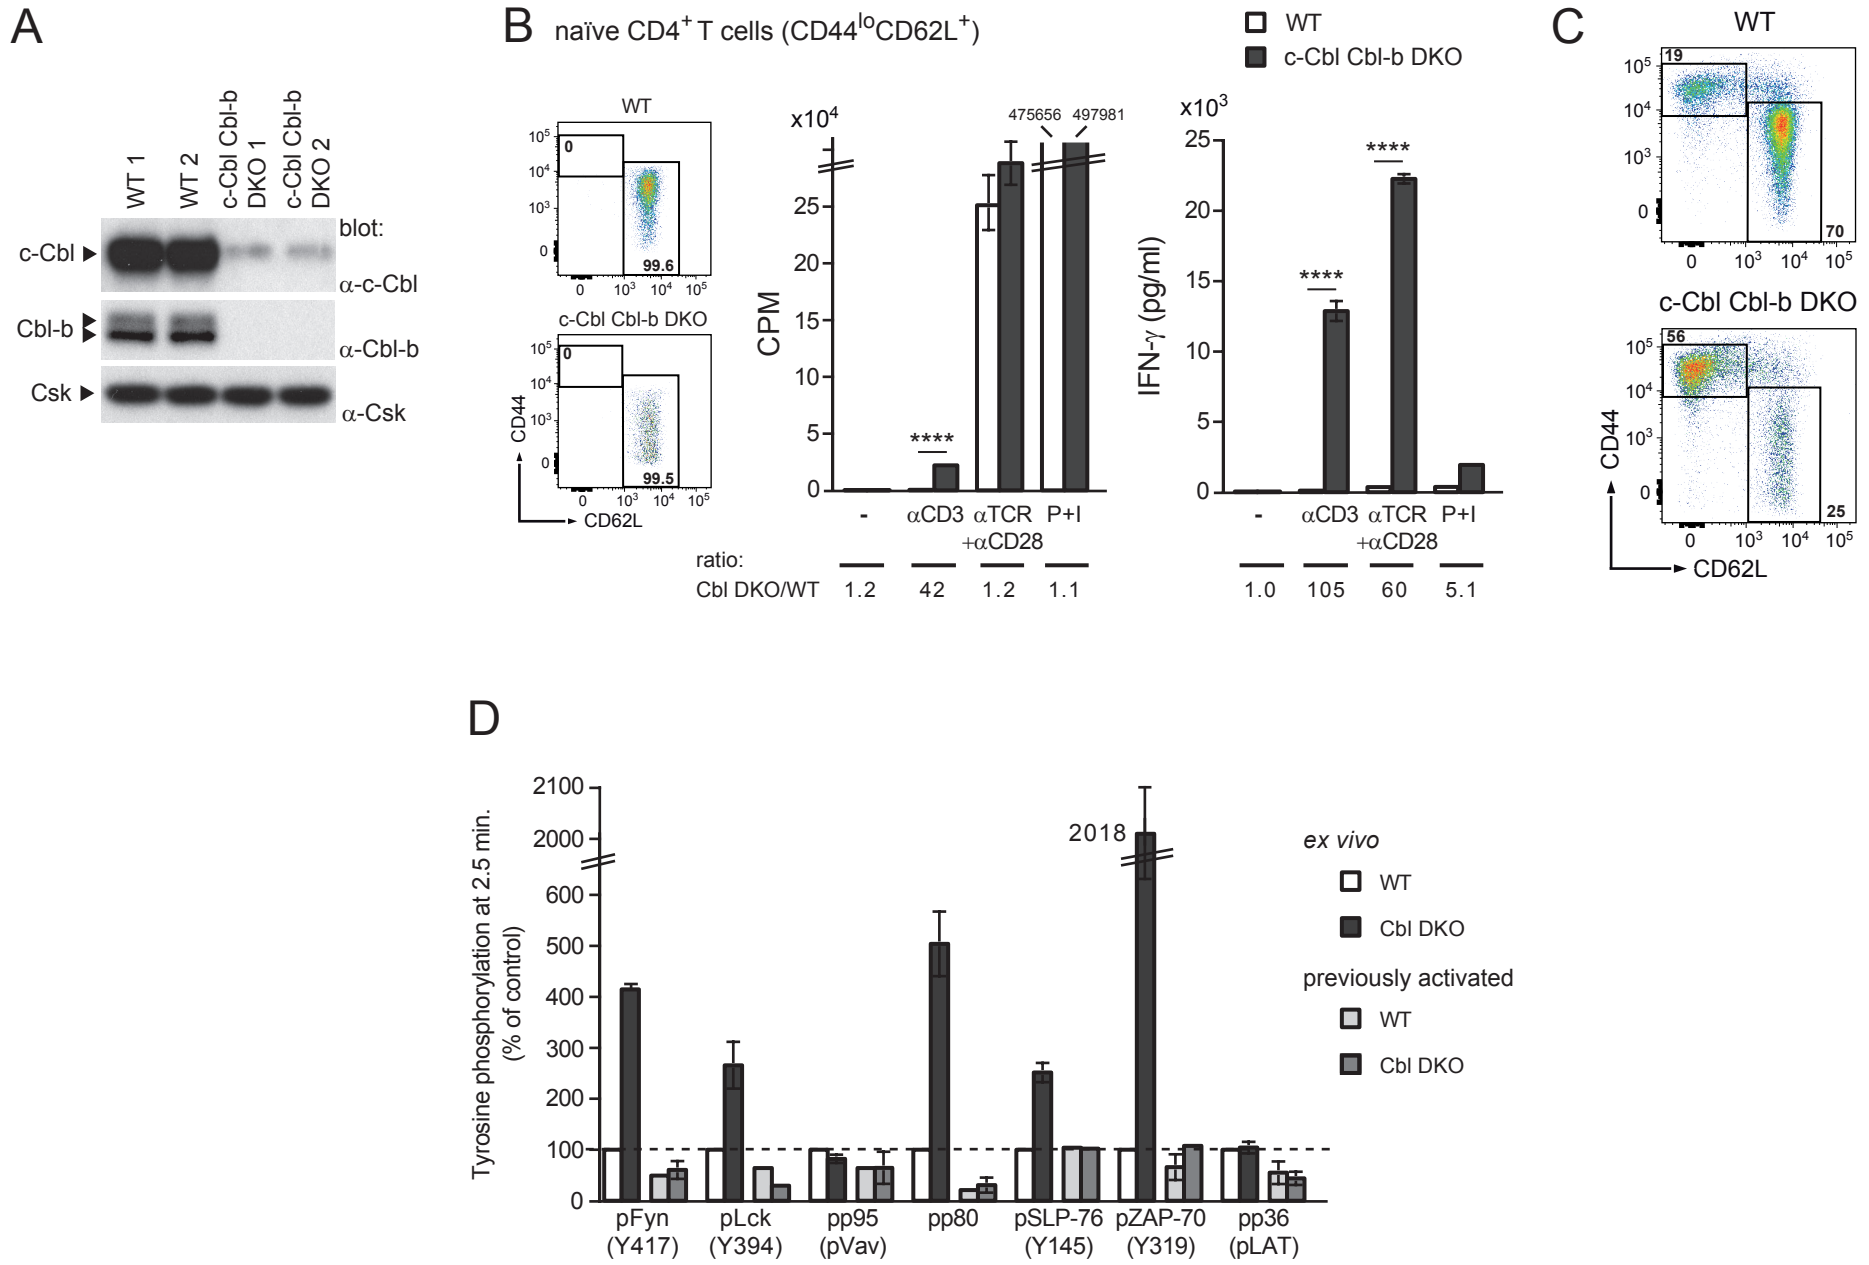

Figure S7

**Supplemental Figure 7. Related to Figure 7. Impact of Cbl proteins on T cell responses.** (A). Same as Figure 7A, except that expression of c-Cbl and Cbl-b was analyzed by immunoblotting of total cell lysates. Since the c-Cbl KO is the result of breeding of a floxed c-Cbl allele with *Cd4-Cre*, a small amount of residual c-Cbl is present, due to incomplete deletion of the allele. Two mice of each genotype were analyzed. (B). Naive CD4<sup>+</sup> T cells (CD44<sup>lo</sup>CD62L<sup>+</sup>) were purified by cell sorting from WT or c-Cbl Cbl-b DKO mice. Purity was assessed by flow cytometry (left). Cells were then stimulated with anti-CD3 (1 μg/ml), anti-TCR (1 μg/ml) plus anti-CD28 (1 μg/ml), or P+I (right). Thymidine incorporation and IFN-γ secretion were assessed (right). (C). Freshly isolated CD4<sup>+</sup> T cells from the indicated mice were stained with anti-CD44 and anti-CD62L antibodies, to identify naive (CD44<sup>lo</sup>CD62L<sup>+</sup>) and effector-memory (CD44<sup>hi</sup>CD62L<sup>-</sup>) cells. Cells were then analyzed by flow cytometry. (D). Quantification of the data depicted in Figure 7C,D. Extent of phosphorylation 2.5 minutes after stimulation of *ex vivo* T cells from WT mice was considered as 100%. Mean values with SD are shown. \*\*\*\*p<0.0001. Representative of n = 2 (A), n = 2 (B) and n = 8 (C).

**A Mice aged 1.5 - 3 months:**

|                                                        | WT (n=4)     | PAG KO (n=3) | p value |    |
|--------------------------------------------------------|--------------|--------------|---------|----|
| <b>Thymus</b>                                          |              |              |         |    |
| CD4 <sup>+</sup> CD8 <sup>-</sup>                      | 7.43 ± 1.50  | 6.95 ± 1.20  | 0.6712  | ns |
| CD4 <sup>-</sup> CD8 <sup>+</sup>                      | 2.69 ± 0.61  | 3.07 ± 0.62  | 0.4412  | ns |
| CD4 <sup>+</sup> CD8 <sup>+</sup>                      | 88.24 ± 2.08 | 87.15 ± 1.80 | 0.5006  | ns |
| CD4 <sup>-</sup> CD8 <sup>-</sup>                      | 2.12 ± 0.19  | 2.30 ± 0.29  | 0.3280  | ns |
| <b>Spleen</b>                                          |              |              |         |    |
| CD4 <sup>+</sup> CD8 <sup>-</sup>                      | 16.87 ± 2.33 | 17.71 ± 1.98 | 0.6359  | ns |
| CD4 <sup>-</sup> CD8 <sup>+</sup>                      | 9.89 ± 0.40  | 9.88 ± 1.08  | 0.9823  | ns |
| CD4 <sup>-</sup> CD8 <sup>-</sup>                      | 73.11 ± 2.17 | 72.54 ± 3.01 | 0.7794  | ns |
| CD4 <sup>+</sup> CD44 <sup>lo</sup> CD62L <sup>+</sup> | 72.60 ± 2.05 | 74.55 ± 0.66 | 0.1264  | ns |
| CD4 <sup>+</sup> CD44 <sup>hi</sup> CD62L <sup>-</sup> | 12.40 ± 1.04 | 11.30 ± 0.26 | 0.1503  | ns |
| CD4 <sup>+</sup> PD1 <sup>+</sup> CXCR5 <sup>+</sup>   | 4.93 ± 0.74  | 3.60 ± 0.38  | 0.0506  | ns |
| CD4 <sup>+</sup> FoxP3 <sup>+</sup>                    | 13.57 ± 0.57 | 12.58 ± 1.79 | 0.4066  | ns |
| CD4 <sup>+</sup> Vβ8.1/8.2                             | 22.07 ± 0.67 | 21.25 ± 1.32 | 0.3774  | ns |

**B Mice aged 9 - 13 months:**

|                                                        | WT (n=6)     | PAG KO (n=9) | p value |    |
|--------------------------------------------------------|--------------|--------------|---------|----|
| <b>Spleen</b>                                          |              |              |         |    |
| CD4 <sup>+</sup> CD44 <sup>lo</sup> CD62L <sup>+</sup> | 52.77 ± 2.13 | 59.32 ± 3.12 | 0.1450  | ns |
| CD4 <sup>+</sup> CD44 <sup>hi</sup> CD62L <sup>-</sup> | 33.04 ± 2.32 | 27.85 ± 1.53 | 0.1051  | ns |
| CD19 <sup>+</sup> GL7 <sup>+</sup>                     | 1.14 ± 0.056 | 1.40 ± 0.14  | 0.0633  | ns |

Table S1

**Supplemental Table 1. Related to Figure 1.** Flow cytometry analyses of various immune cell populations in thymus and spleen of WT and PAG KO mice, aged 1.5-3 months (A) or 9-13 months (B). Means (expressed as percentages) with SD and *p* values are indicated. ns: not significant.



**A Basal immunoglobulin levels (mice aged 1.5 - 3 months):**

|               | <b>WT (n=12)</b> | <b>PAG KO (n=12)</b> | <b>p VALUE</b> |    |
|---------------|------------------|----------------------|----------------|----|
| IgG1 (µg/ml)  | 411 ± 40         | 476 ± 61             | 0.3711         | ns |
| IgG2b (µg/ml) | 366 ± 66         | 363 ± 49             | 0.9709         | ns |
| IgG2c (µg/ml) | 40 ± 15          | 53 ± 15              | 0.5689         | ns |
| IgG3 (µg/ml)  | 128 ± 31         | 108 ± 20             | 0.5913         | ns |
| IgM (µg/ml)   | 158 ± 22         | 156 ± 26             | 0.9417         | ns |
| IgE (ng/ml)   | 1317 ± 40        | 1319 ± 86            | 0.9807         | ns |

**B Basal immunoglobulin levels (mice aged 9 - 13 months):**

|               | <b>WT (n=5)</b> | <b>PAG KO (n=8)</b> | <b>p VALUE</b> |    |
|---------------|-----------------|---------------------|----------------|----|
| IgG1 (µg/ml)  | 894 ± 167       | 734 ± 145           | 0.4957         | ns |
| IgG2b (µg/ml) | 492 ± 106       | 480 ± 81            | 0.9313         | ns |
| IgG2c (µg/ml) | 231 ± 36        | 197 ± 17            | 0.3471         | ns |
| IgG3 (µg/ml)  | 368 ± 99        | 337 ± 67            | 0.7985         | ns |
| IgM (µg/ml)   | 560 ± 38        | 526 ± 83            | 0.7567         | ns |
| IgE (ng/ml)   | 2714 ± 410      | 2160 ± 247          | 0.2474         | ns |

Table S2

**Supplemental Table 2. Related to Figure 1.** Analysis of levels of basal immunoglobulins (Ig) in WT and PAG KO mice, aged 1.5-3 months (A) or 9-13 months (B). Data were obtained by ELISA. Means with SEM and *p* values are indicated. ns: not significant.

## Supplemental experimental procedures

**DNA constructs and retroviral infection.** cDNAs encoding wild-type PAG or PAG Y314F

were cloned in the retroviral vector pMIGR1, which also contains the GFP-encoding gene. To

down-regulate Dok-1 or Dok-2 expression using shRNA, we utilized the retroviral vector

pSUPER.retro.neo+gfp (OligoEngine, Seattle, WA) containing the sequences

5'GATCCCCGTGCATTCCAAGAAACCTCTTCAAGAGAGAGGTTTCTTGGAATGCACTT

TTTAAGCTTAAAAAGTGCATTCCAAGAAACCTCTCTCTTGAAGAGGTTTCTTGGAAT

GCACGGG 3' (for Dok-1) or

5'GATCCCCAACACGACACGGCAATGAGTTCAAGAGACTCATTGCCGTGTCGTGTTTT

TTTAAGCTTAAAAAACACGACACGGCAATGAGTCTCTTGAACCTCATTGCCGTGTCG

TGTTGGG 3' (for Dok-2). A vector containing the random sequence

5'GATCCCCGCGCGCTTTGTAGGATTCGTTCAAGAGACGAATCCTACAAAGCGCGCT

TTTAAGCTTAAAAAGCGGCCTTTGTAGGATTCGTTCAAGAGACGAATCCTACAAAG

CGCGCGGG 3' was used as non-specific control. In all cases, retroviral infection was

performed using previously activated T cells, as outlined elsewhere (Davidson et al., 2010).

**Antibodies.** For flow cytometry, the following antibodies were used: anti-CD4 MAb GK1.5,

anti-CD4 MAb RM4-5, anti-CD8 MAb 53-6.7, anti-CD3 MAb 145-2C11, anti-TCR $\beta$  H57.197,

anti-TCRV $\beta$ 8.1/8.2 MAb MR5-2, anti-TCRV $\alpha$ 11.1/11.2 MAb RR8-1, anti-TCRV $\alpha$ 2 MAb

B20.1, anti-CD44 MAb 1M7, anti-CD62L MAb MEL-14, anti-FoxP3 FJK-16a, anti-CXCR5

2G8, anti-CD279 PD-1 J43, anti-CD19 1D3, anti-B220 MAb RA3-6B2, anti-T and B cell

activation antigen MAb GL7, anti-CD45 LCA-Ly5 30F11, anti-CD45RA 14.8 and anti-

CD45RO PTPRC. They were purchased from BD Biosciences (Mississauga, Ontario, Canada),

eBioscience/Affymetrix (San Diego, CA) or Thermo Fisher Scientific. For immunoprecipitation

and immunoblot, we used rabbit antibodies against PAG, Csk, PTPN22, ZAP-70, Fyn, Lck, Dok-1, Dok-2, c-Cbl, SLP-76, CD45, SHIP-1, SHP-1 and phosphotyrosine generated in our laboratory (Davidson et al., 2003; Davidson et al., 2007; Davidson et al., 2010). Antibodies recognizing Erk (catalog no. 9102), Akt (catalog no. 9272), p38 (catalog no. 9212), JNK (catalog no. 9252), PKC- $\theta$  (catalog no. sc-212), I $\kappa$ B $\alpha$  (catalog no. sc-371), Cbl-b (MAb D3C12), PLC- $\gamma$ 1 (catalog no. sc-81), Ras-GAP (catalog no. sc-63),  $\beta$ -actin (catalog no. sc-47778) as well as phospho-specific antibodies recognizing Src (pY416; also recognizing Lck Y394 and Fyn Y417; catalog no. 2101), pLck (pY505; catalog no. 2751), ZAP-70 (pY319; catalog no. 2701), Erk (pT202pY204; MAb E10), Akt (pS473; MAb 193H12), p38 (pT180pY182; catalog no. 9211), JNK (pT183pY185; catalog no. 9251), PKC- $\theta$  (pT538; catalog no. 9277), I $\kappa$ B $\alpha$  (pS32pS36; MAb 5A5), PLC- $\gamma$ 1 (pY783; catalog no. 2821) and SLP-76 (Y145; catalog no. 14770) were obtained from Cell Signaling Technology (Danvers, MA) or Santa-Cruz Biotechnology Inc. (Santa Cruz, CA); phospho-specific anti-Dok-1/2 (pY361/351; catalog no. DP2241) was obtained from ECM Biosciences.

**Calcium fluxes.** T cells were loaded with Indo-1 (10  $\mu$ M; Molecular Probes, Eugene, OR), as described (Davidson et al., 2007). They were then stimulated at 37°C with biotinylated anti-TCR or anti-CD3 and avidin. Intracellular calcium fluxes were monitored using a BD LSR or Fortessa cell analyzer (BD Biosciences). As control, cells were stimulated with ionomycin (100 ng/ml).

**Anergy.** For anergy induced *in vitro* by anti-CD3, CD4<sup>+</sup> T cells were activated for 48 hrs with anti-CD3 and anti-CD28. They were then propagated in IL-2 for 3 days. Anergy was subsequently induced by treating cells with anti-CD3 alone (1  $\mu$ g/ml) for 16 hrs. Controls were with no addition. After resting the cells in growth medium for 30 hrs, they were re-stimulated with anti-TCR and anti-CD28 for 48 hrs. Thymidine incorporation and IL-2 secretion were

measured. To induce anergy *in vivo*, OT-II mice were injected I.V. with OVA peptide [500 µg in phosphate-buffered saline (PBS)] or PBS alone on day 0 and day 3. On day 10, CD4<sup>+</sup> CD44<sup>hi</sup> Vα2<sup>+</sup> T cells were isolated by cell sorting, and anergy was measured by stimulating cells with OVA peptide and irradiated WT splenocytes. Proliferation and IL-2 secretion were measured. Anergy index was calculated as described elsewhere (Davidson et al., 2007).

## References

- Davidson, D., Bakinowski, M., Thomas, M.L., Horejsi, V., and Veillette, A. (2003). Phosphorylation-dependent regulation of T-cell activation by PAG/Cbp, a lipid raft-associated transmembrane adaptor. *Mol Cell Biol* 23, 2017-2028.
- Davidson, D., Schraven, B., and Veillette, A. (2007). PAG-associated FynT regulates calcium signaling and promotes anergy in T lymphocytes. *Mol Cell Biol* 27, 1960-1973.
- Davidson, D., Shi, X., Zhong, M.C., Rhee, I., and Veillette, A. (2010). The phosphatase PTP-PEST promotes secondary T cell responses by dephosphorylating the protein tyrosine kinase Pyk2. *Immunity* 33, 167-180.
